# Supplementary material
Source: Research Square preprint supplement (doi:10.21203/rs.3.rs-8917425/v1)
Supplement: Supplementary file 1 [file 9376e3775d398b4d48374367.docx]

| **Table 2 :**  Management and follow up of UTI according to infection risk factor | | |  |  | |
| --- | --- | --- | --- | --- | --- |
|  | Low-risk  *n=97* | | High-risk  *n=41* | | **Total**  *n=138* |
| Days with fever, median [IQR] | | 1 [0 ; 1] | 1 [0.5 ; 2] | | 1 [0 ; 1] |
| IV antibiotic duration ≤4 days, n (%) | | 95 (98) | 32 (78) | | 127 (92) |
| Recurrent UTI within 30 days, n (%) | | 1 | 0 (0) | | 1 (0.7) |
| Antibiotic prophylaxis at discharge, n (%) | | 6 (6) | 23 (56) | | 29 (21) |
| Voiding cystourethrography performed, n (%) | | 4 (4) | 23 (56) | | 27 (16.7) |
| Vesicoureteral reflux diagnosed, n (%) | | 0 (0) | 11 (27) | | 11 (7.9) |
| Recurrent UTI during follow-up, n (%) | | 5 (5) | 4 (10) | | 9 (6.5) |

*Data are presented as median [interquartile range] or number (percentage). “Low-risk” corresponds to neonates with no risk factors for severe infection. “High-risk or ESBL” includes neonates with at least one risk factor (clinical severity, bacteremia, pyelo-ureteral dilatation, or infection with an extended-spectrum beta-lactamase [ESBL]–producing organism). Recurrent UTI within 30 days refers to early recurrence; recurrent UTI during follow-up refers to later episodes occurring beyond 30 days after discharge. IQR: interquartile range; UTI: urinary tract infection.*
